# Supplementary material for: Novel bamboo leaf shaped CuO nanorod@hollow carbon fibers derived from plant biomass for efficient and nonenzymatic glucose detection
Source: Royal Society of Chemistry journal article supplement (doi:10.1039/c5an00675a), 2015-01-01
Supplement: c5an00675a1.pdf [file c5an00675a1.pdf]

## Electronic Supplementary Information

### **Novel bamboo leaf shaped CuO nanorods@hollow carbon fibers derived from plant biomass for efficient and nonenzymatic glucose detection**

Mian Li <sup>a</sup>, Zheng Zhao <sup>b</sup>, Xiaotian Liu <sup>b</sup>, Yueping Xiong <sup>b</sup>, Ce Han <sup>a</sup>, Yufan Zhang <sup>a</sup>,  
Xiangjie Bo <sup>a\*</sup> and Liping Guo <sup>a,\*</sup>

<sup>a</sup> *Faculty of Chemistry, Northeast Normal University, Changchun, 130024, P. R. China*

<sup>b</sup> *School of Chemical Engineering and Technology, Harbin Institute of Technology, Harbin 150001, China*

\* Corresponding authors

Tel.: +86-0431-85099762.

Fax: +86-0431-85099762.

E-mail address: [baoxj133@nenu.edu.cn](mailto:baoxj133@nenu.edu.cn) (X. Bo), [guolp078@nenu.edu.cn](mailto:guolp078@nenu.edu.cn) (L. Guo).

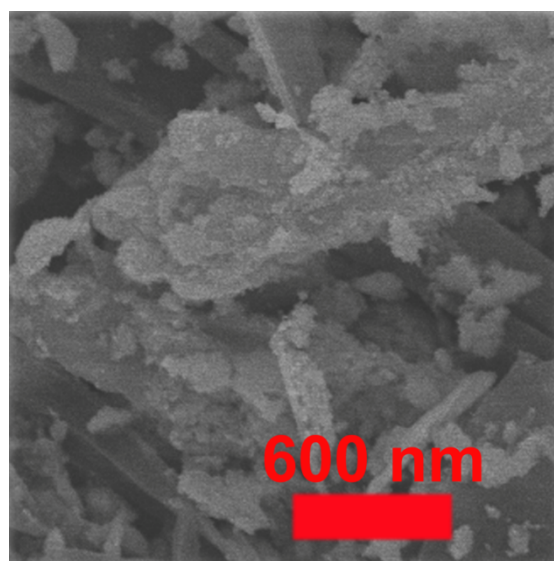

Fig. S1 SEM image of the CuO NRs@PCF (9 h).

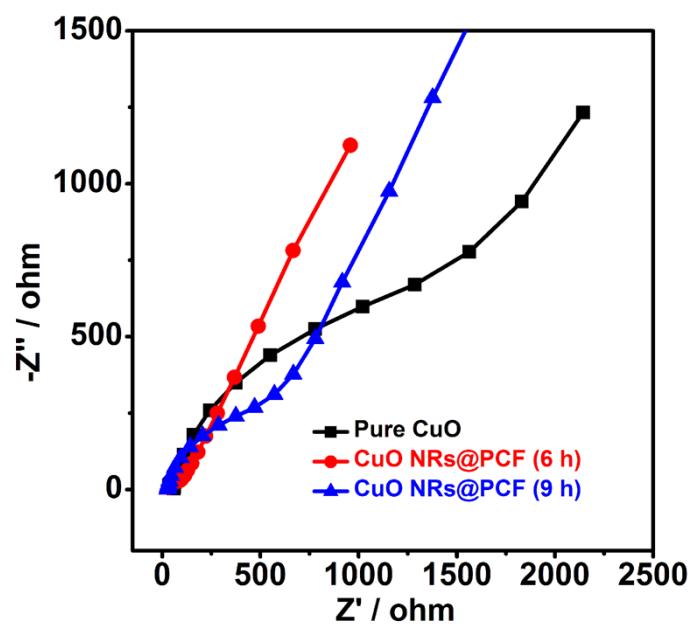

Fig. S2 Nyquist plots at pure CuO/GCE, CuO NRs@PCF(6 h)/GCE and CuO NRs@PCF(9 h)/GCE in 0.1 M KCl solution containing 5 mM  $[\text{Fe}(\text{CN})_6]^{3-/4-}$ .

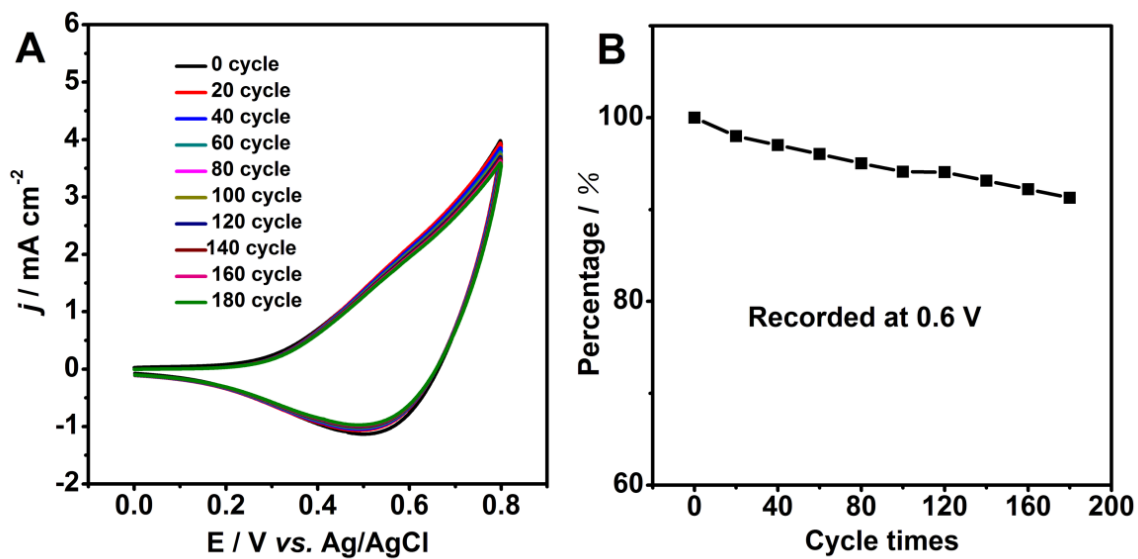

Fig. S3 (A) CV plots recorded for CuO NRs@PCF/GCE after different CV cycles. (B) The current density recorded at 0.6 V after different CV cycles.

Table S1

| n                      | Detected by our method<br>(mM) <sup>a</sup> | Detected by hospital<br>(mM) <sup>b</sup> |
|------------------------|---------------------------------------------|-------------------------------------------|
| 1                      | 6.02                                        | 6.01                                      |
| 2                      | 5.95                                        | 5.99                                      |
| 3                      | 6.015                                       | 6.02                                      |
| 4                      | 6.051                                       | 6.03                                      |
| 5                      | 6.05                                        | 5.98                                      |
| 6                      | 5.98                                        | 6.02                                      |
| 7                      | 6.08                                        | -                                         |
| 8                      | 6.02                                        | -                                         |
| 9                      | 5.965                                       | -                                         |
| Average (x)            | 6.014556                                    | 6.008333                                  |
| Standard Deviation (s) | 0.04293                                     | 0.0194                                    |

To compare the accuracy and precision of the method in real sample analysis, t-test and F-test have been used.

For the t-test:  $t_a = |x_a - T| / s_a \times n^{-1/2}$ . First, we detected the glucose concentration of

human serum for 9 times ( $n=9$ ) and got a  $x_a$  value of 6.014556 mM accompanying an  $s$  value of 0.04293. As the glucose concentration value detected by the local hospital acts as the standard value ( $T = x_b = 6.00833$  mM); thus,  $t_a = 0.435$ , compared with that of  $t_{0.95, 8}$  (2.31),  $t_a < t_{0.95, 8}$ ; this result proved that the system error is very small in the detection process by our method.

When for the F-test ( $F = s_{\text{big}}^2/s_{\text{small}}^2$ ) in our detection of the glucose concentration for human serum, we mainly contrast the significant differences of two methods. Thus,  $s_{\text{big}} = s_a$ ,  $s_{\text{small}} = s_b$ , and then  $F=4.3528$ ; meanwhile, the  $F_{0.95}$  got from standard table is 4.82. One can see that  $F (4.3528) < F_{0.95} (4.82)$ , which illustrates that there is no significant difference between our method and that of local hospital.
